# Supplementary material for: Temperature Modeling, a Key to Assessing Impact on Rivers Due to Urbanization and Climate Change
Source: MDPI journal article supplement (doi:10.3390/w14131994), 2022-06-22
Supplement: s1 [file s1]

## SUPPLEMENTARY

**Table S1. Climate Parameters Pertinent to Fletchers Creek Subwatershed**

**Climate Parameters of Fletchers Creek subwatershed**

|      | Precipitation/year<br>(mm) | Evapotranspiration mm/year |
|------|----------------------------|----------------------------|
| 2008 | 1026                       | 599                        |
| 2009 | 725                        | 603                        |
| 2010 | 876                        | 637                        |
| 2011 | 910                        | 617                        |
| 2012 | 667                        | 689                        |
| 2013 | 861                        | 620                        |
| 2014 | 755                        | 625                        |
| 2015 | 637                        | 671                        |
| 2016 | 609                        | 770                        |
| 2017 | 826                        | 668                        |
| 2018 | 673                        | 663                        |

**Table S2 Soil Types in Fletchers Creek sub-watershed**

| Sub5 Soil Types |           |                 |
|-----------------|-----------|-----------------|
| Soil Type       | Area (ha) | Soils Type<br>% |
| Clay            | 576       | 12              |
| Clay Loam       | 3903      | 81              |
| Variable        | 314       | 7               |
| Total           | 4793      | 100             |

### **S1**

Atmospheric heat fluxes include net shortwave solar radiation (HS), net atmospheric longwave radiation (HA), longwave radiation from water (HBR), conductive heat transfer (HC), and evaporative heat transfer (HE) (Thomann and Mueller, 1987). The net heat flux between the stream and the sediment bed (HGW) is the sum of conduction and advection. Heat from runoff sources is also included. The model uses: Net solar radiation, Net atmospheric radiation, Water radiation, Latent heat flux, Sensible heat flux,

Groundwater heat flux, Overland and Overland Drainage heat flux. However, in the presence set up the overland and overland drainage and groundwater heat flux is not used.

**Table S3 Time Steps Used for Calibration of MIKE SHE and MIKE HYDRO**

| Time Steps                |           |         |
|---------------------------|-----------|---------|
| Process in Model          | Time Step | Unit    |
| MIKE HYDRO                | 1         | Second  |
| MIKE SHE-Overland         | 30        | Minutes |
| MIKE SHE-Unsaturated zone | 30        | Minutes |
| MIKE SHE-Saturated zone   | 6         | Hours   |

**Table S4 Water Balance Analysis with for 2016 and 2017 with climate change RCP4.5 scenario**

|                        | 2016- A relatively Dry Year |                                | 2017- A relatively Wet Year |                                |
|------------------------|-----------------------------|--------------------------------|-----------------------------|--------------------------------|
|                        | No Climate Change           | Climate Change RCP4.5 Scenario | No Climate Change           | Climate Change RCP4.5 Scenario |
|                        | Cumulated in mm             |                                | Cumulated in mm             |                                |
| Precipitation          | 609                         | 643                            | 792                         | 821                            |
| Evapotranspiration     | 449                         | 457                            | 436                         | 439                            |
| Overland Flow to River | 58                          | 94                             | 195                         | 210                            |
| SZ Drain to River      | 45                          | 56                             | 91                          | 96                             |
| Base flow to river     | 58                          | 59                             | 73                          | 75                             |

Table S4 shows that evapotranspiration increased from 449 mm to 457 mm (by 1%) and overland flow increased from 58 mm to 94 mm (by 36mm) in a typical dry year and evapotranspiration increased from 436 mm to 439 mm and overland flow increased from 195 mm to 210 mm (by 15mm) in a typical wet year.

**Table S5 Number of Hours the Fletchers Creek Temperature Increase with Climate Change RCP 4.5 Scenario in 2050 (Base a Dry Year-2016)**

| <i>Distance From Start (m)</i>       | 0    | 5000 | 11000 | 17000 | 21000 | 25607 |
|--------------------------------------|------|------|-------|-------|-------|-------|
| <i>Increase in Water Temperature</i> | (m)  | (m)  | (m)   | (m)   | (m)   | (m)   |
| <0 and =0                            | 673  | 803  | 570   | 559   | 456   | 439   |
| >0 and <1                            | 7960 | 6827 | 7086  | 7186  | 7403  | 7511  |
| >=1 and <2                           | 78   | 721  | 734   | 778   | 720   | 666   |
| >=2 and <3                           | 21   | 272  | 264   | 162   | 134   | 98    |
| >=3 and <4                           | 4    | 63   | 60    | 42    | 24    | 23    |
| >=4 and <5                           | 1    | 29   | 19    | 10    | 0     | 0     |
| >=5 and <6                           | 0    | 18   | 4     | 0     | 0     | 0     |
| >=6 and <7                           | 0    | 4    | 0     | 0     | 0     | 0     |
| >=7                                  | 0    | 0    | 0     | 0     | 0     | 0     |

**Table S6 No of Hours the Fletchers Creek Temperature Increase with Climate Change RCP 4.5 Scenario in 2050 (Base a Wet Year-2017)**

| <i>Distance From Start (m)</i>       | 0    | 5000 | 11000 | 17000 | 21000 | 25607 |
|--------------------------------------|------|------|-------|-------|-------|-------|
| <i>Increase in Water Temperature</i> | (m)  | (m)  | (m)   | (m)   | (m)   | (m)   |
| <0 and =0                            | 698  | 1295 | 941   | 730   | 574   | 535   |
| >0 and <1                            | 7695 | 5870 | 6277  | 6642  | 6935  | 7059  |
| >=1 and <2                           | 273  | 1026 | 1094  | 1021  | 969   | 908   |
| >=2 and <3                           | 50   | 317  | 238   | 227   | 202   | 184   |
| >=3 and <4                           | 17   | 150  | 131   | 95    | 40    | 36    |
| >=4 and <5                           | 4    | 43   | 29    | 12    | 12    | 13    |
| >=5 and <6                           | 0    | 16   | 18    | 7     | 5     | 2     |
| >=6 and <7                           | 0    | 5    | 3     | 3     | 0     | 0     |
| >=7 and <8                           | 0    | 5    | 6     | 0     | 0     | 0     |
| >=8 and <9                           | 0    | 9    | 0     | 0     | 0     | 0     |
| >=9                                  | 0    | 1    | 0     | 0     | 0     | 0     |

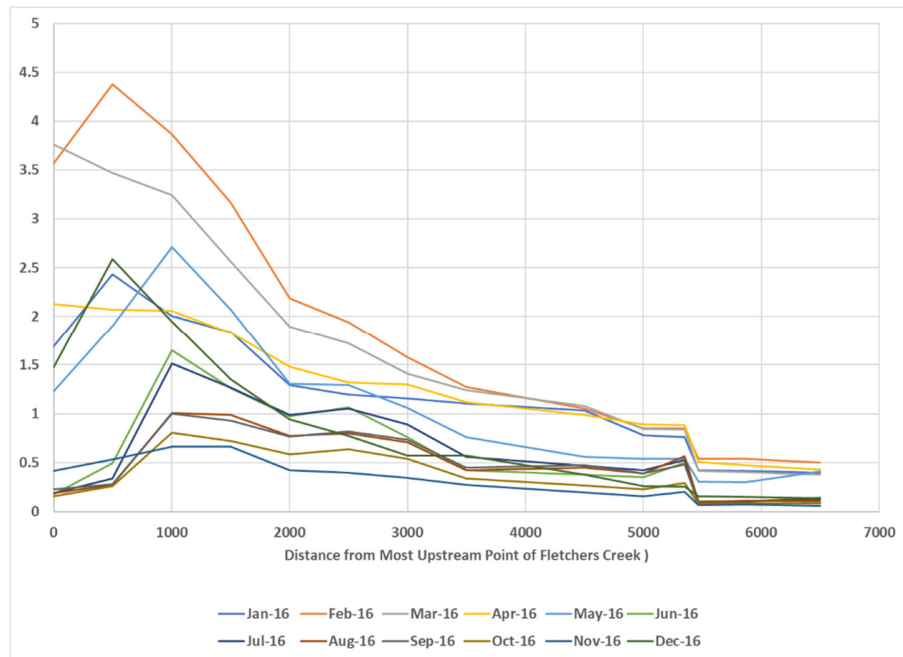

**Figure S1 Maximum Monthly Hourly Temperature Change in Fletcher's Creek with Land Use Change from Existing to Low Density Urban Land Use Change (Scenario-1) in 2016**

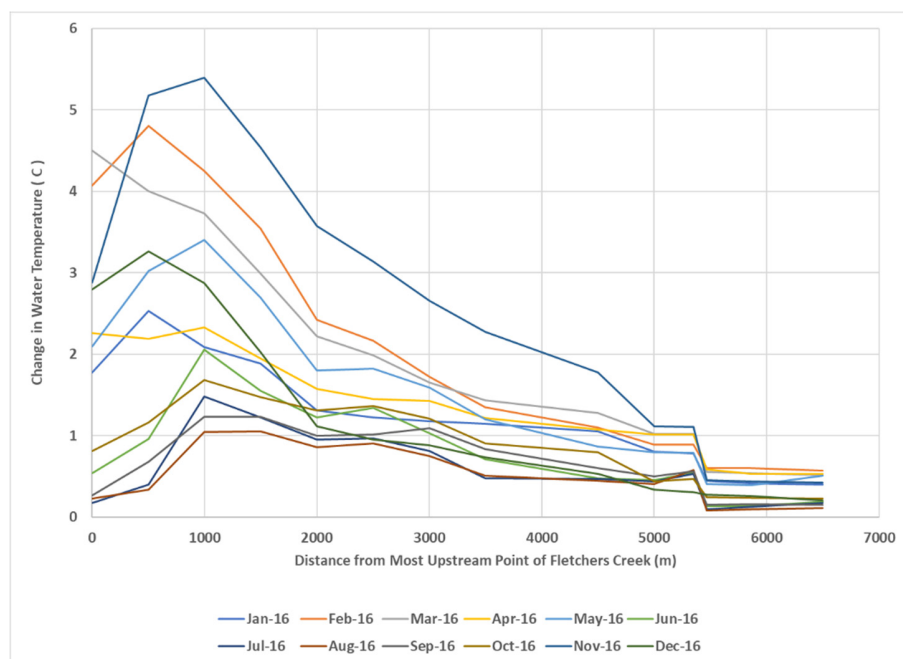

**Figure S2 Maximum Monthly Hourly Temperature Change in Fletchers Creek with Land Use Change from Existing to High Density Urban Land Use Change (Scenario-2) in 2016**

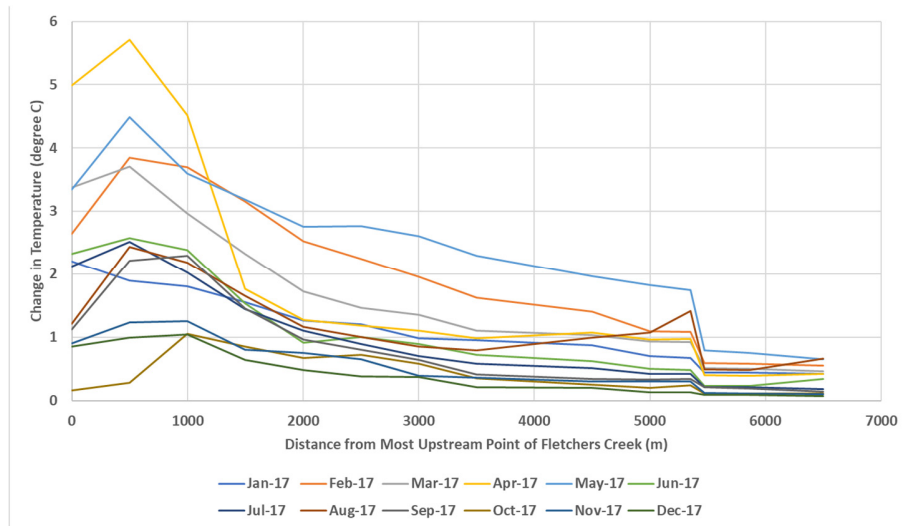

**Figure S3 Maximum Monthly Hourly Temperature Change in Fletchers Creek with Land Use Change from Existing to Low Density Urban Land Use Change (Scenario-1) in 2017**

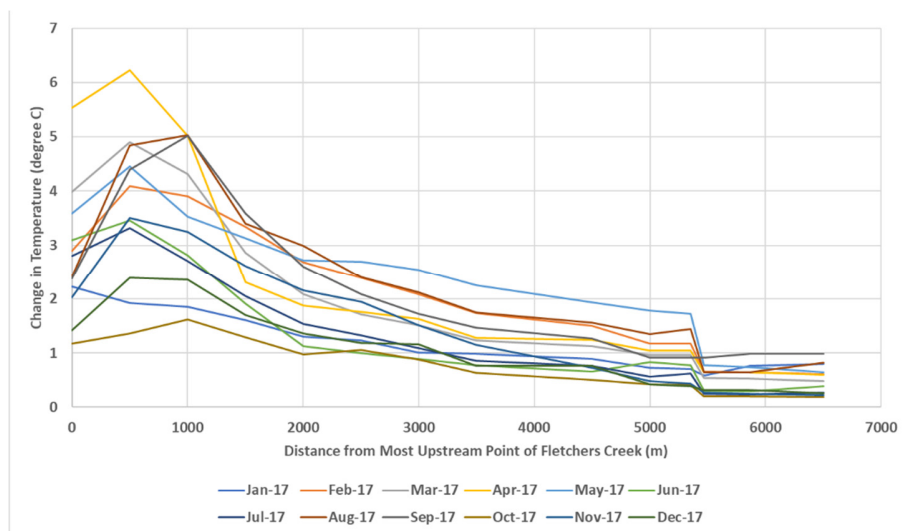

**Figure S4 Maximum Monthly Hourly Temperature Change in Fletchers Creek with Land Use Change from Existing to High Density Urban Land Use Change (Scenario-2) in 2017**
